# Supplementary material
Source: PubMed Central journal article supplement (PMC7400734)
Supplement: NIHMS1610582-supplement-Supplemental_Table.pdf [file NIHMS1610582-supplement-Supplemental_Table.pdf]

| Gene symbol   | Forward primers (5' to 3')        | Reverse primers (5' to 3')        |
|---------------|-----------------------------------|-----------------------------------|
| <i>Rplp0</i>  | CAC TGG TCT AGG ACC CGA GAA G     | GGT GCC TCT GGA GAT TTT CG        |
| <i>Chrebp</i> | AGA ACC GAC GTA TCA CAC ACA TCT   | CAG GGT GTC GAA TCC TAG CTT AA    |
| <i>Mlx</i>    | GGA GCT CTC AGC TTG TGT CTT CA    | CAC CGA TCA CAA TCT CTC GTA GAG T |
| <i>Glut5</i>  | GGC GCT GCA GAA CAC CAT           | AAG GCG TGT CCT ATG ACG TAG AC    |
| <i>Glut2</i>  | CAA CTG GGT CTG CAA TTT TGT C     | GAA CAC GTA AGG CCC AAG GA        |
| <i>Khk</i>    | CGT GAG GAG CTC TTC CAG TTG       | CAG GTG CTT GGC CAC ATC T         |
| <i>AldoA</i>  | CCC TTC CCC CAA GTT ATC AA        | GGG CAC CAC ACC CTT ATC TAC       |
| <i>AldoB</i>  | AAT GGG CTG GTC CCT ATT GTT       | GGC AGT GCT CCA GGT CAT G         |
| <i>AldoC</i>  | GAG AAG GTC CTG GCT GCT GTA TA    | CAT GTT GGG CTT GAG CAG AGT       |
| <i>Sgt1</i>   | CCT CCC TGA AGA ATG TCA GAA ATA C | CGC AGT CCA TTA GGC ATG AGT       |
| <i>Nhe3</i>   | CAC CCC GCC CAT CTA CTG T         | AGC ACT GAC ATT TTC CCT CAA GA    |
| <i>Dra</i>    | AGA GGA GTT TAA GAA GAC GCA CAG A | GGA GCA GCT ACA ACA CCC TTT G     |

| Gene symbol       | Forward primers (5' to 3')        | Reverse primers (5' to 3')        |
|-------------------|-----------------------------------|-----------------------------------|
| <i>Rplp0</i>      | CAC TGG TCT AGG ACC CGA GAA G     | GGT GCC TCT GGA GAT TTT CG        |
| <i>Chrebp</i>     | AGA ACC GAC GTA TCA CAC ACA TCT   | CAG GGT GTC GAA TCC TAG CTT AA    |
| <i>Mlx</i>        | GGA GCT CTC AGC TTG TGT CTT CA    | CAC CGA TCA CAA TCT CTC GTA GAG T |
| <i>Glut5</i>      | GGC GCT GCA GAA CAC CAT           | AAG GCG TGT CCT ATG ACG TAG AC    |
| <i>Glut2</i>      | CAA CTG GGT CTG CAA TTT TGT C     | GAA CAC GTA AGG CCC AAG GA        |
| <i>Khk</i>        | CGT GAG GAG CTC TTC CAG TTG       | CAG GTG CTT GGC CAC ATC T         |
| <i>AldoA</i>      | CCC TTC CCC CAA GTT ATC AA        | GGG CAC CAC ACC CTT ATC TAC       |
| <i>AldoB</i>      | AAT GGG CTG GTC CCT ATT GTT       | GGC AGT GCT CCA GGT CAT G         |
| <i>AldoC</i>      | GAG AAG GTC CTG GCT GCT GTA TA    | CAT GTT GGG CTT GAG CAG AGT       |
| <i>Sgt1</i>       | CCT CCC TGA AGA ATG TCA GAA ATA C | CGC AGT CCA TTA GGC ATG AGT       |
| <i>Nhe3</i>       | CAC CCC GCC CAT CTA CTG T         | AGC ACT GAC ATT TTC CCT CAA GA    |
| <i>Dra</i>        | AGA GGA GTT TAA GAA GAC GCA CAG A | GGA GCA GCT ACA ACA CCC TTT G     |
| <i>Triokinase</i> | GTG TTT GCC TCT CCT CCT GT        | AGC CGA TCC CCA GTG TAG TT        |
| <i>G6pase</i>     | GGC GCA GCA GGT GTA TAC TAT GT    | CAA ACA CCG GAA TCC ATA CGT       |
| <i>Fbp1</i>       | TGG ATT GTG GTG TCA ACT GCT       | TAC TCA TTG ATG GCA GGG TCA       |
| <i>Dgat2</i>      | GCC CTC CTC GAA GAT CAC CT        | GAG CTG ACC TGG TTC CCA TCT A     |
| <i>Ldh</i>        | TGT TGG GGT TGG TGC TGT TGG CAT   | AAC AAG GGC AAG CTC ATC CGC CAA   |
