# Supplementary material
Source: PubMed Central journal article supplement (PMC7400734)

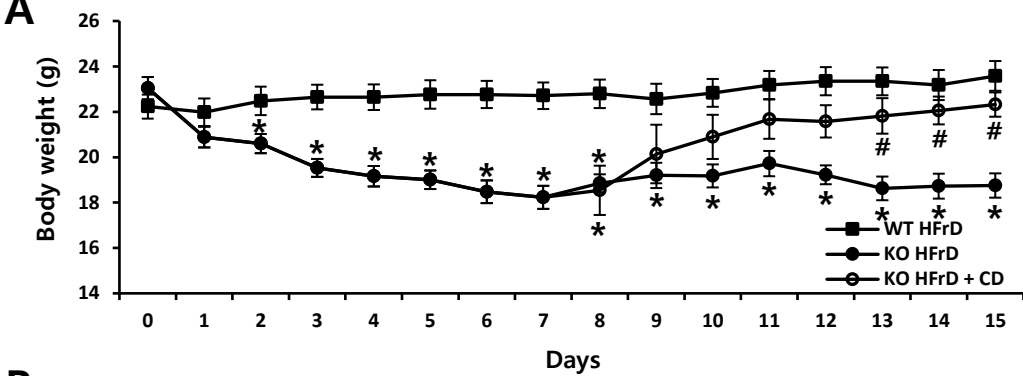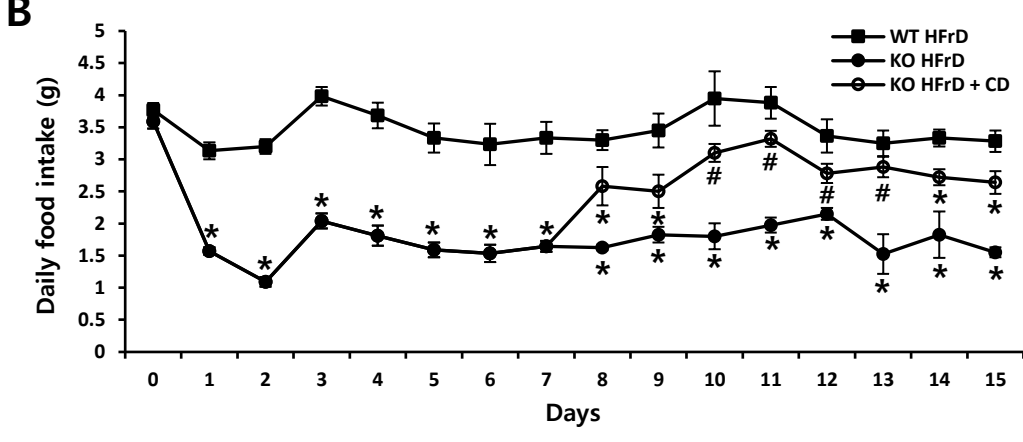

**A**

ChREBP consensus sequence    CANNTG   NNNNN   CANNTG  
mNHE3 ChoRE1 -1248/-1264    CATTTG   AAATG   TGAATG

**B**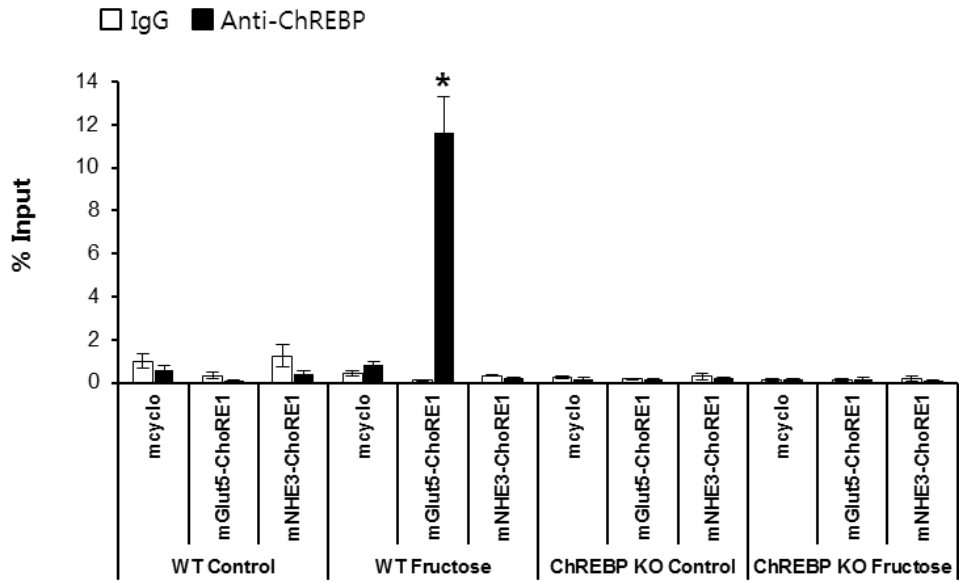

Supplement: NIHMS1610582-supplement-Supplemental_figures.pdf [file NIHMS1610582-supplement-Supplemental_figures.pdf]
